# Supplementary material
Source: publisher figshare collection journal article supplement (https://acs.figshare.com/ndownloader/files/25816160)

**[Supporting Information]**

**Large Scale Synthesis of Eldecalcitol**

Hyung Wook Moon, Seung Jong Lee, Seong Hu Park, Se Gyo Jung, In A Jung, Chang Hun Seol,  
Seung Woo Kim, Seon Mi Lee, Bogonda Gangganna, Seokhwi Park, Kee-Young Lee, Chang-Young  
Oh,

Juyoung Song, Jaehun Jung, Ji Soo Heo, Kang Hee Lee, Hae Sol Kim, Won Taek Lee, Areum Baek,  
Hyunik Shin\*

R&D Center, Yonsung Fine Chemicals Co., Ltd., Innoplex-2-dong, 306, Sinwon-ro, Yeongtong-gu,  
Suwon-si, Gyeonggi-do, 16675, Republic of Korea

*hishin@yonsungchem.co.kr*

**Table of Contents**

|                                                                                       |        |
|---------------------------------------------------------------------------------------|--------|
| Scheme S1                                                                             | S2     |
| Experimental procedures of <b>23</b> , <b>24</b> , <b>3</b> , <b>7</b> , and <b>8</b> | S2–S4  |
| Copies of <sup>1</sup> H and <sup>13</sup> C NMR spectra of all compounds             | S5–S28 |

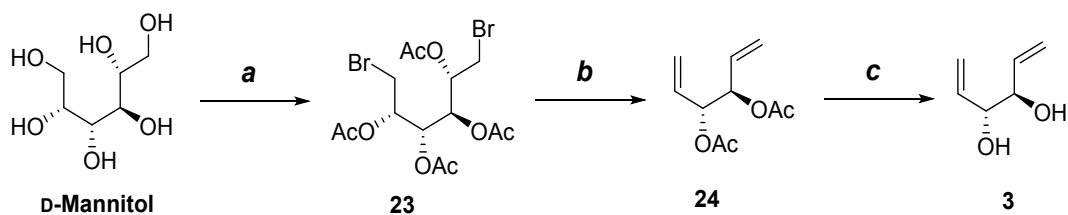

**Scheme S1.** Synthesis of **3**. *Reagents and conditions:* (a) i) AcBr, 1,4-dioxane, 3 d, rt; ii) Ac<sub>2</sub>O, pyridine, 12 h, rt, 36%; (b) NaOAc, Zn, AcOH, 110 °C, 1 h, 100%; (c) K<sub>2</sub>CO<sub>3</sub>, MeOH, rt, 1 h, 100%.

## Experimental Procedures

### (2*S*,3*S*,4*S*,5*S*)-1,6-Dibromohexane-2,3,4,5-tetrayl tetraacetate (**23**)

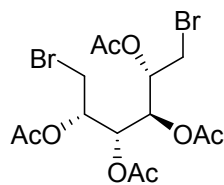

To a dispersion of D-mannitol (15.0 kg, 82.3 mol) in 1,4-dioxane (151 L) was added AcBr (14.8 L, 199.7 mol) at rt for 3 days and solvent was evaporated. To the resulting substance was added pyridine (34 L, 414.3 mol) and cooled to 10 °C. To the reaction mixture was added Ac<sub>2</sub>O (36 L, 377.0 mol) at 10 °C. The reaction mixture was stirred at rt for 12 h and solvent was evaporated. To the resulting substance was added EtOH (23 L). The solution was stirred at rt for 1 h, filtered, washed with EtOH (12 L), and concentrated *in vacuo*. The product **23** (14.2 kg, 29.8 mol, 36%) was used in the next step without further purification. <sup>1</sup>H NMR (300 MHz, CDCl<sub>3</sub>) δ 5.42 (2H, d, *J* = 8.1 Hz), 5.13–5.08 (2H, m), 3.55 (2H, dd, *J* = 11.7, 3.6 Hz), 3.39 (1H, d, *J* = 6.0 Hz), 3.35 (1H, d, *J* = 6.0 Hz), 2.12 (6H, s), 2.11 (6H, s); <sup>13</sup>C NMR (75 MHz, CDCl<sub>3</sub>) δ 169.9, 169.8, 69.3, 69.0, 30.8, 20.9, 20.8.

(3*R*,4*R*)-Hexa-1,5-diene-3,4-diyl diacetate (**24**)

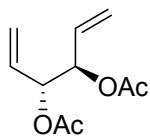

To a solution of compound **23** (14.2 kg, 29.8 mol) in AcOH (71 L) were added NaOAc (5.38 kg, 65.6 mol) and Zn (7.80 kg, 119.3 mol) at rt. The reaction mixture was stirred at 110 °C for 1 h, cooled to rt, filtered, and evaporated. To the crude compound were added water (71 L) and AcOEt (71 L). The reaction mixture was stirred for 30 min. The organic layer was separated, dried over Na<sub>2</sub>SO<sub>4</sub>, and concentrated *in vacuo*. The product **24** (5.91 kg, 29.8 mol, 100%) was used in the next step without further purification. <sup>1</sup>H NMR (300 MHz, CDCl<sub>3</sub>) δ 5.82–5.71 (2H, m), 5.44–5.38 (2H, m), 5.33 (2H, d, *J* = 17.1 Hz), 5.28 (2H, d, *J* = 10.5 Hz), 2.09 (6H, s); <sup>13</sup>C NMR (75 MHz, CDCl<sub>3</sub>) δ 169.9, 132.8, 119.3, 74.4, 21.0.

(3*R*,4*R*)-Hexa-1,5-diene-3,4-diol (**3**)

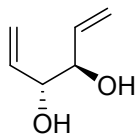

To solution of compound **24** (5.91 kg, 29.8 mol) in MeOH (30 L) was added K<sub>2</sub>CO<sub>3</sub> (0.82 kg, 5.93 mol). The reaction mixture was stirred at rt for 1 h and concentrated *in vacuo*. The product **3** (3.41 kg, 29.8 mol, 100%) was used in the next step without further purification. <sup>1</sup>H NMR (300 MHz, CDCl<sub>3</sub>) δ 5.92–5.81 (2H, m), 5.36 (2H, d, *J* = 17.4 Hz), 5.25 (2H, d, *J* = 10.8 Hz), 4.00 (2H, dd, *J* = 9.7, 5.3 Hz), 2.94 (2H, s); <sup>13</sup>C NMR (75 MHz, CDCl<sub>3</sub>) δ 136.7, 117.5, 75.8.

### 3-((*tert*-Butyldiphenylsilyl)oxy)propan-1-ol (**7**)

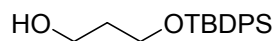

To a dispersion of 1,3-propanediol (1.35 kg, 17.7 mol) in CH<sub>2</sub>Cl<sub>2</sub> (20.3 L) was added Et<sub>3</sub>N (2.48 L, 17.7 mol) at rt. The reaction mixture was cooled to 0 °C. TBDPSCl (4.63 L, 17.7 mol) was added dropwise to the reaction mixture using dropping funnel. The reaction mixture was stirred at rt for 15 h, quenched with water (18 L), and stirred for 10 min. The organic layer was separated, dried over Na<sub>2</sub>SO<sub>4</sub>, and concentrated *in vacuo*. Thin film distillation of the resulting substance at 155 °C under 0.2 torr gave the product **7** (5.04 kg, 16.0 mol, 90%) as a white solid. <sup>1</sup>H NMR (300 MHz, CDCl<sub>3</sub>) δ 7.73–7.66 (4H, m), 7.46–7.35 (6H, m), 3.86–3.81 (4H, m), 2.42 (1H, s), 1.84–1.76 (2H, m), 1.06–1.05 (9H, m); <sup>13</sup>C NMR (75 MHz, CDCl<sub>3</sub>) δ 135.7, 133.4, 129.9, 127.9, 63.3, 62.0, 34.4, 27.0, 19.2.

### 3-((*tert*-Butyldiphenylsilyl)oxy)propyl trifluoromethanesulfonate (**8**)

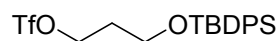

To a dispersion of compound **7** (5.04 kg, 16.0 mol) in *n*-heptane (30 L) was added DIPEA (2.93 L, 16.8 mol) at rt. The reaction mixture was cooled to 10 °C. (TfO)<sub>2</sub>O (2.69 L, 16.0 mol) was added dropwise to the reaction mixture using dropping funnel. The reaction mixture was stirred at 10 °C for 30 min, quenched with water (14 L), and stirred for 10 min. The organic layer was separated, dried over Na<sub>2</sub>SO<sub>4</sub>, and concentrated *in vacuo*. The product **8** (6.79 kg, 15.2 mol, 95%) was immediately used in the next step without further purification. <sup>1</sup>H NMR (300 MHz, CDCl<sub>3</sub>) δ 7.66–7.63 (4H, m), 7.47–7.35 (6H, m), 4.74 (2H, t, *J* = 6.2 Hz), 3.77 (2H, t, *J* = 5.7 Hz), 2.05–1.97 (2H, m), 1.07–1.04 (9H, m); <sup>13</sup>C NMR (75 MHz, CDCl<sub>3</sub>) δ 135.6, 133.3, 130.0, 128.0, 74.6, 58.8, 32.3, 26.9, 19.3.

Compound **23**

$^1\text{H}$  NMR ( $\text{CDCl}_3$ , 300 MHz)

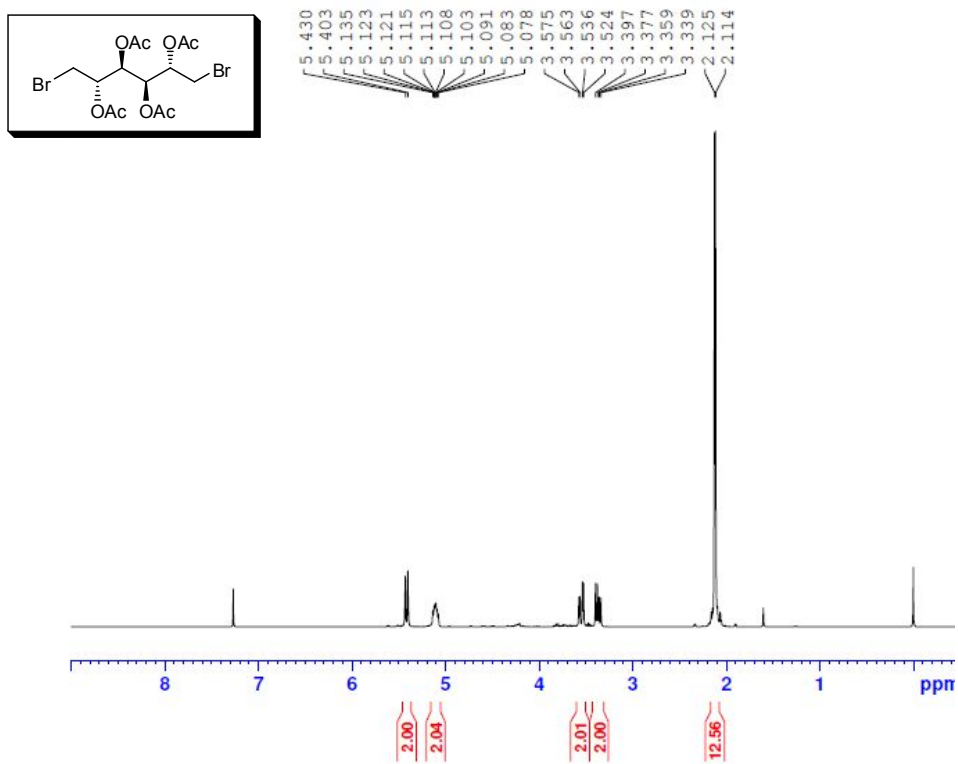

$^{13}\text{C}$  NMR ( $\text{CDCl}_3$ , 75 MHz)

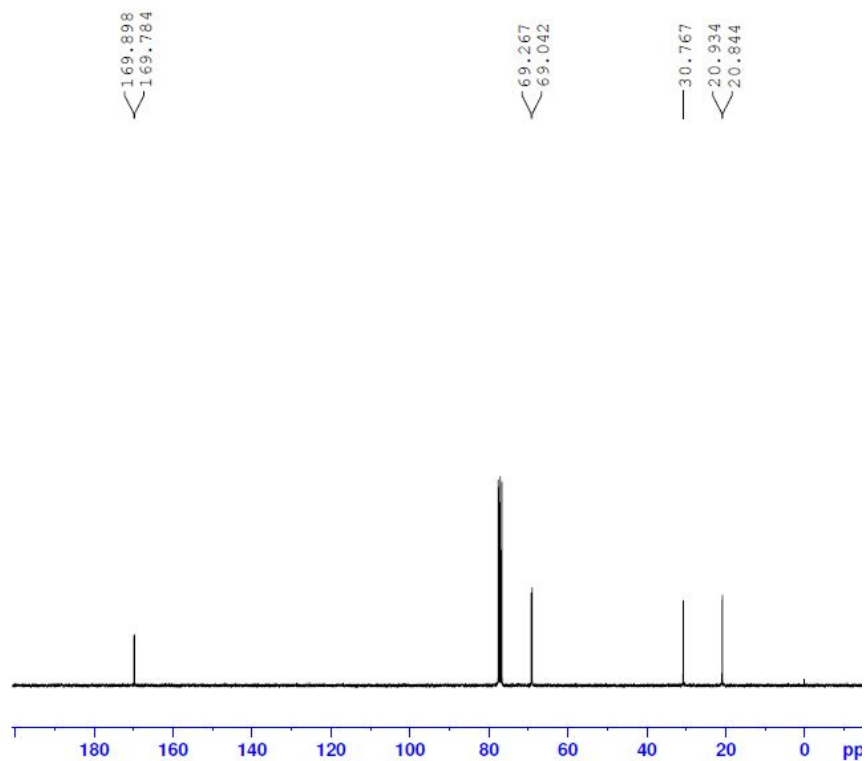

Compound **24**

$^1\text{H}$  NMR ( $\text{CDCl}_3$ , 300 MHz)

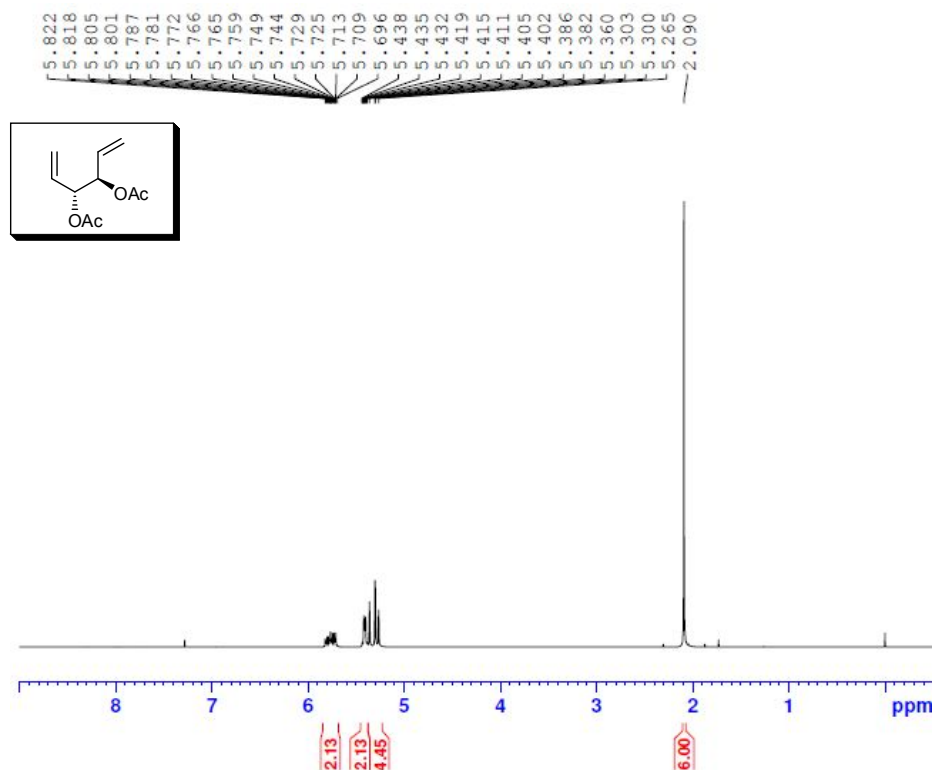

$^{13}\text{C}$  NMR ( $\text{CDCl}_3$ , 75 MHz)

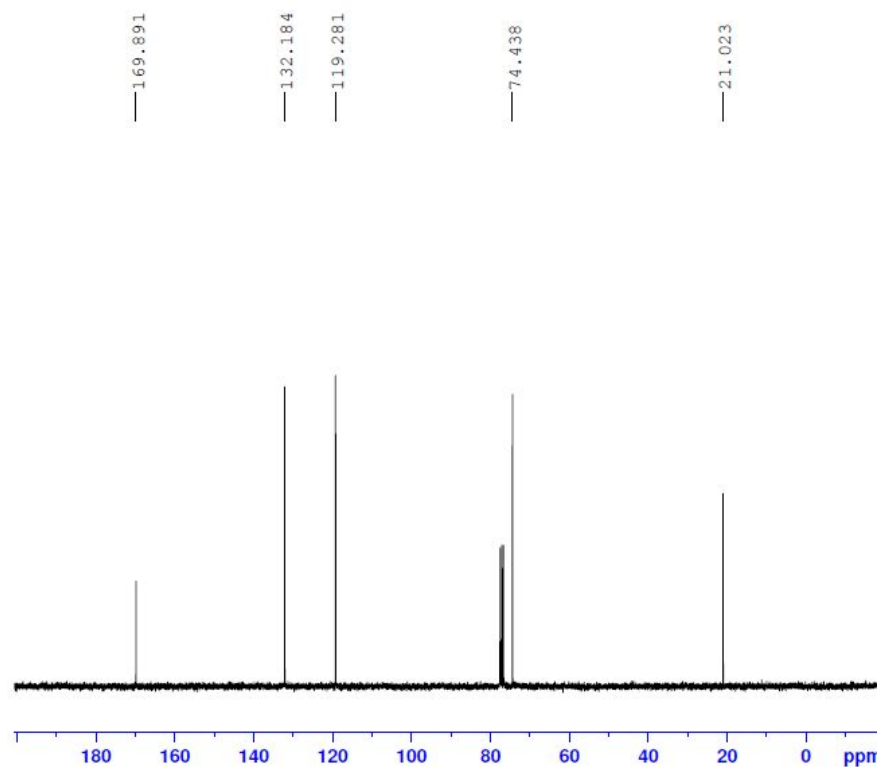

Compound **3**

$^1\text{H}$  NMR ( $\text{CDCl}_3$ , 300 MHz)

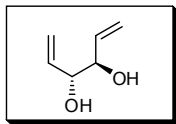

5.925  
5.907  
5.890  
5.885  
5.870  
5.854  
5.850  
5.832  
5.815  
5.390  
5.332  
5.264  
5.228  
4.024  
4.007  
3.992  
3.974  
— 2.941  
— 2.049  
— 1.430  
— 1.255

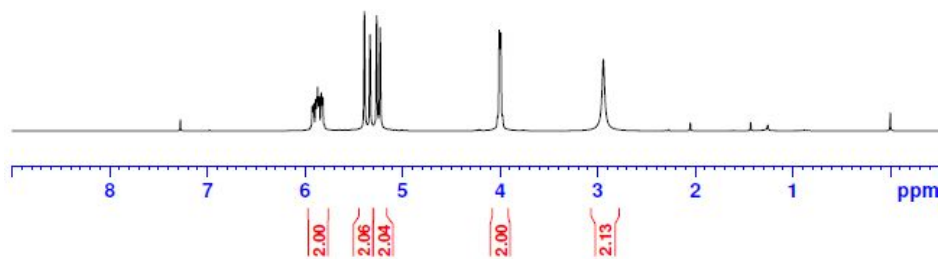

$^{13}\text{C}$  NMR ( $\text{CDCl}_3$ , 75 MHz)

— 136.717  
— 117.498  
— 75.841

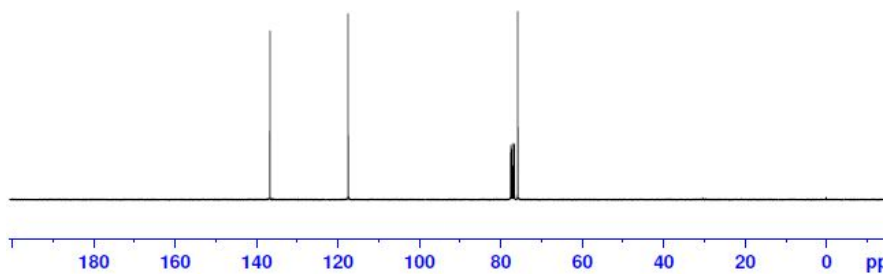

Compound **4**

$^1\text{H}$  NMR ( $\text{CDCl}_3$ , 300 MHz)

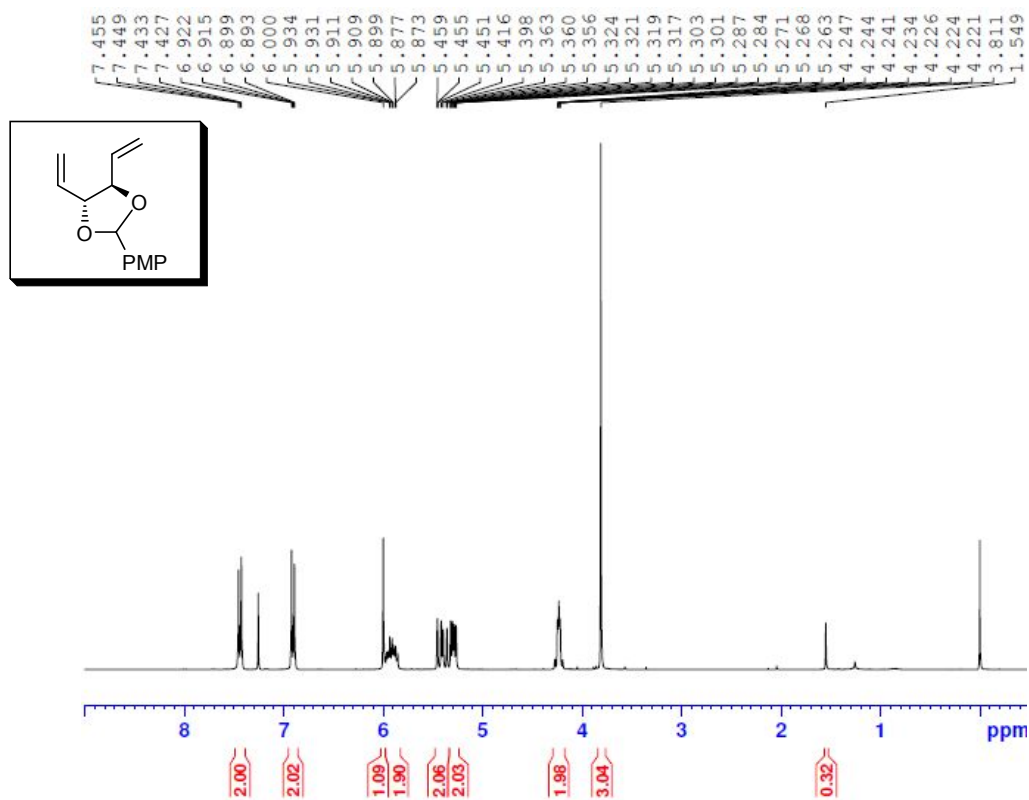

$^{13}\text{C}$  NMR ( $\text{CDCl}_3$ , 75 MHz)

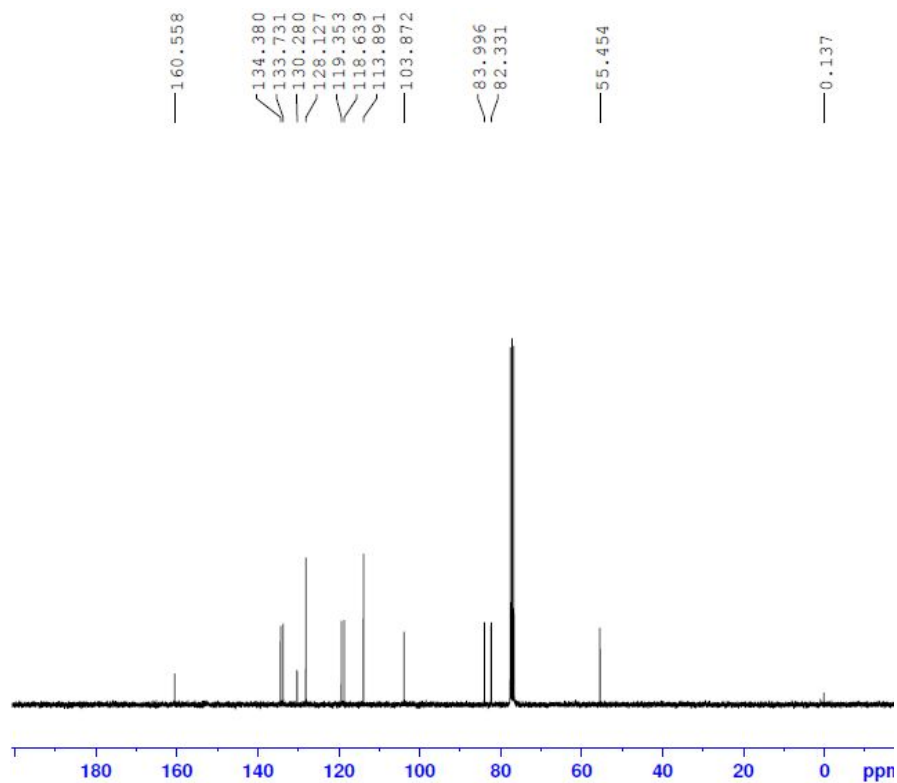



Compound **5**

$^1\text{H}$  NMR ( $\text{CDCl}_3$ , 300 MHz)

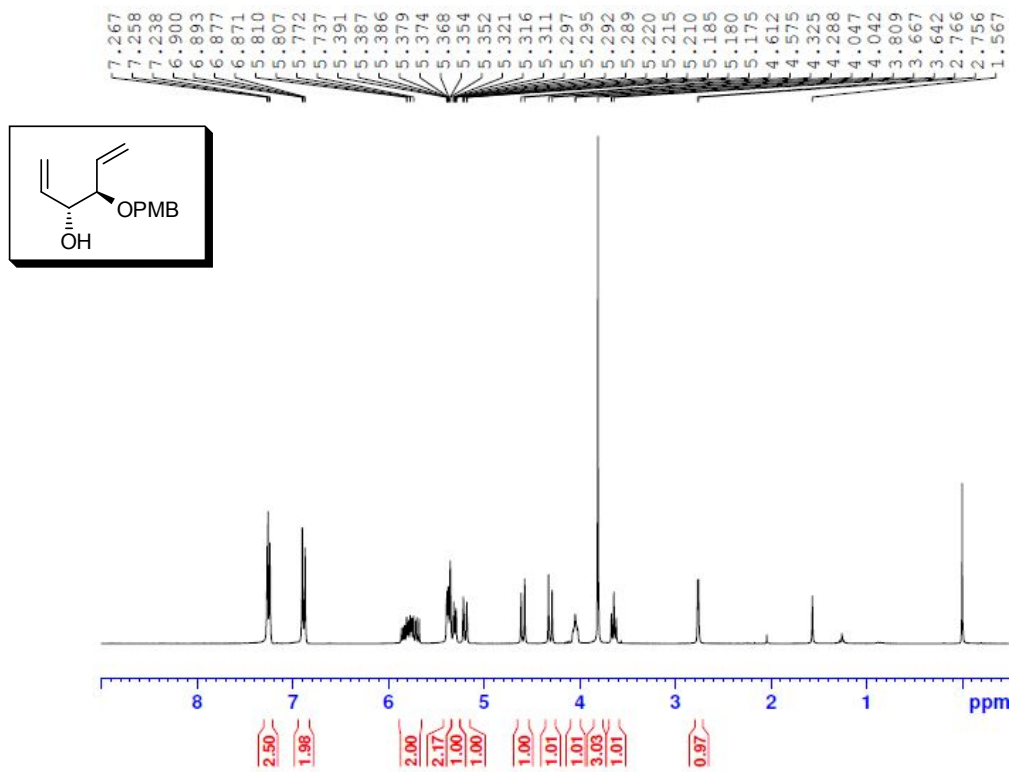

$^{13}\text{C}$  NMR ( $\text{CDCl}_3$ , 75 MHz)

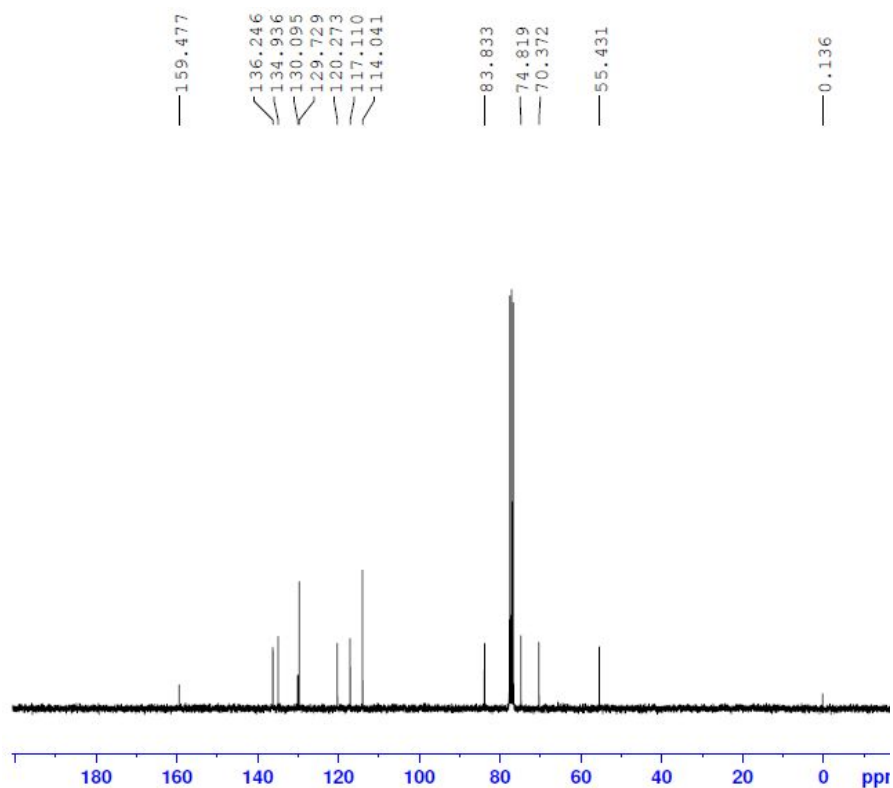

Compound **6**

$^1\text{H}$  NMR ( $\text{CDCl}_3$ , 300 MHz)

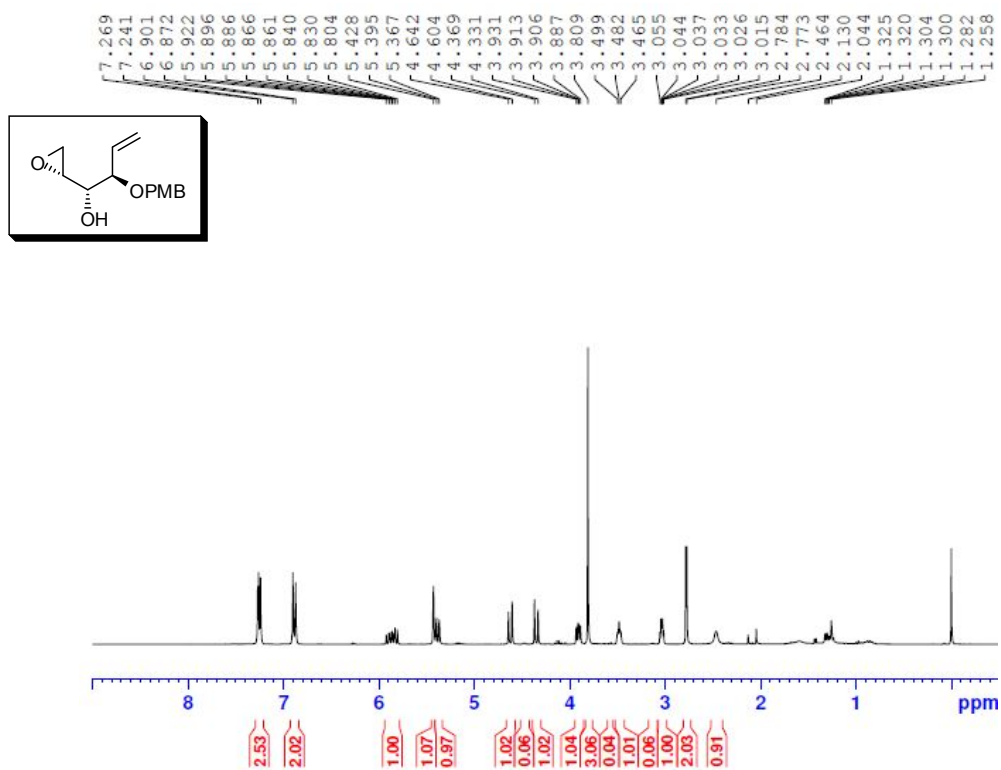

$^{13}\text{C}$  NMR ( $\text{CDCl}_3$ , 75 MHz)

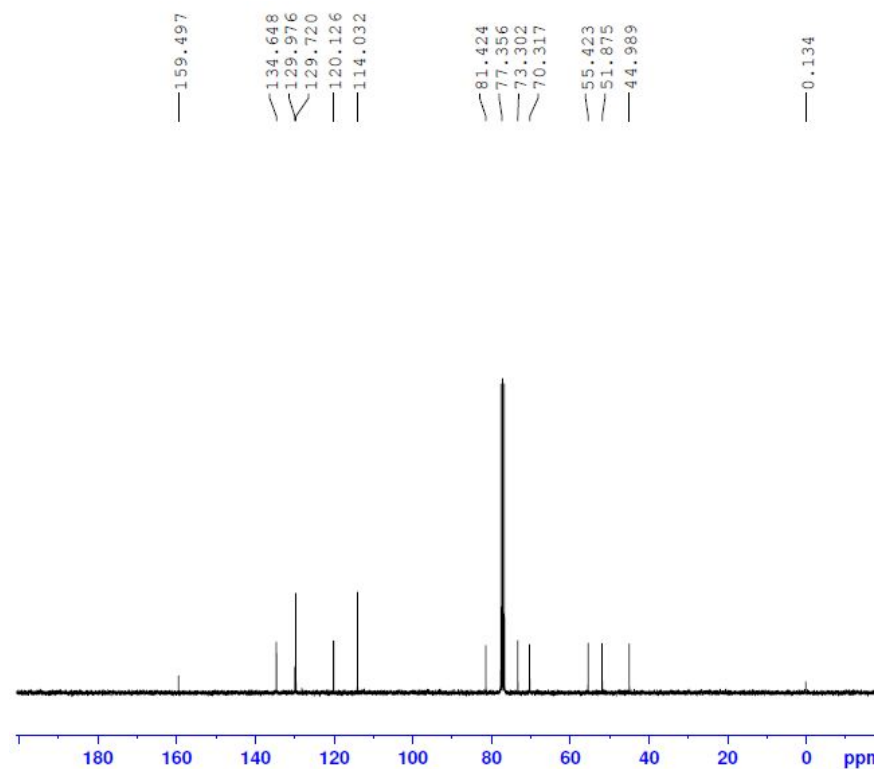

Compound **7**

$^1\text{H}$  NMR ( $\text{CDCl}_3$ , 300 MHz)

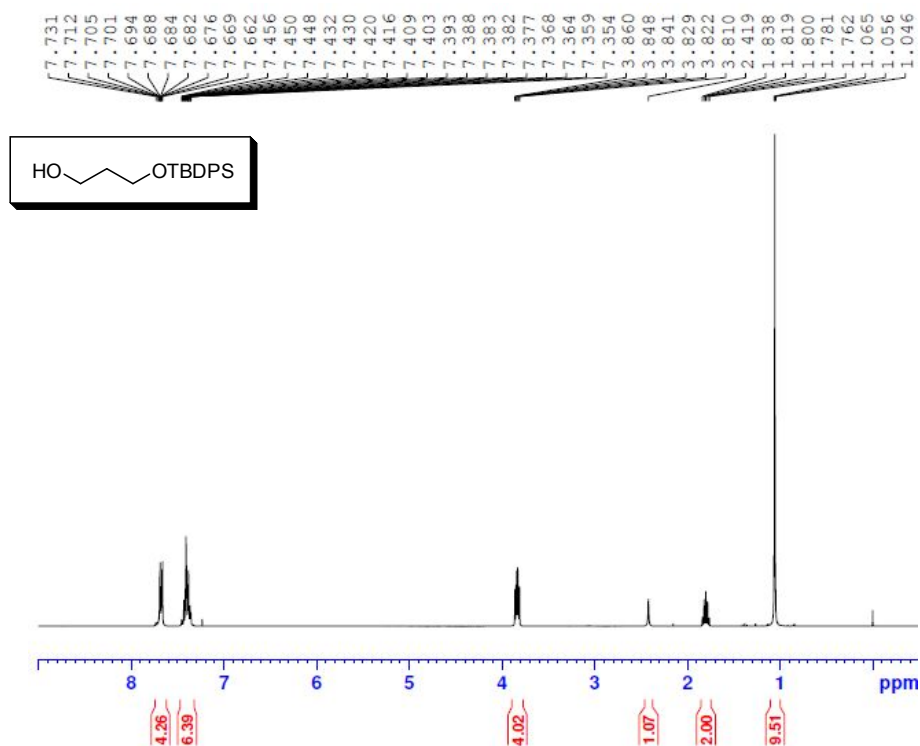

$^{13}\text{C}$  NMR ( $\text{CDCl}_3$ , 75 MHz)

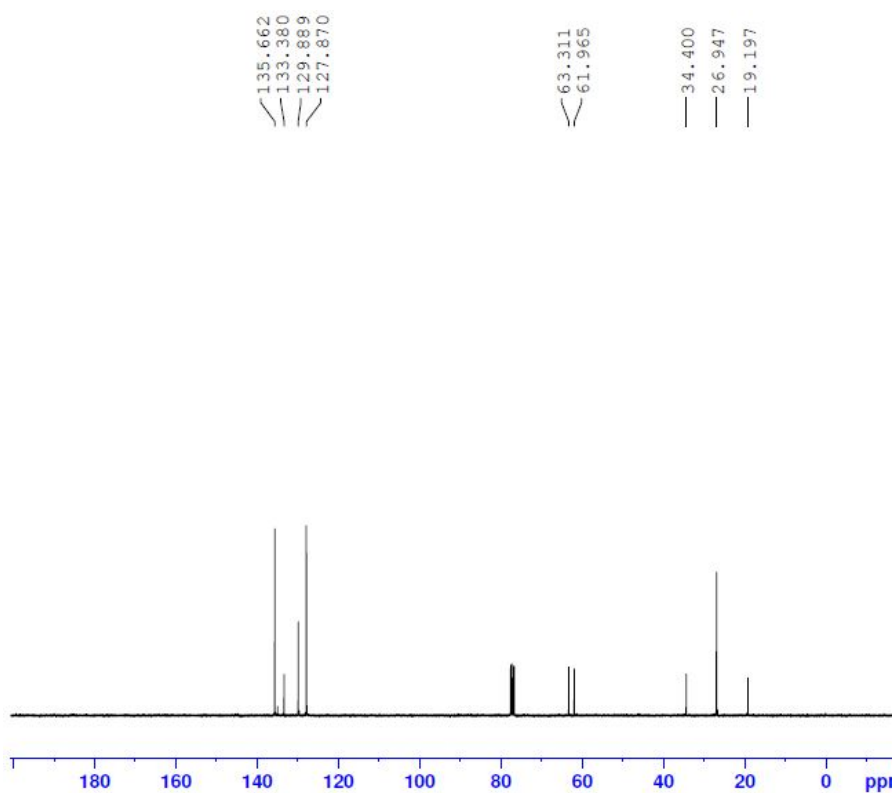

Compound **8**

$^1\text{H}$  NMR ( $\text{CDCl}_3$ , 300 MHz)

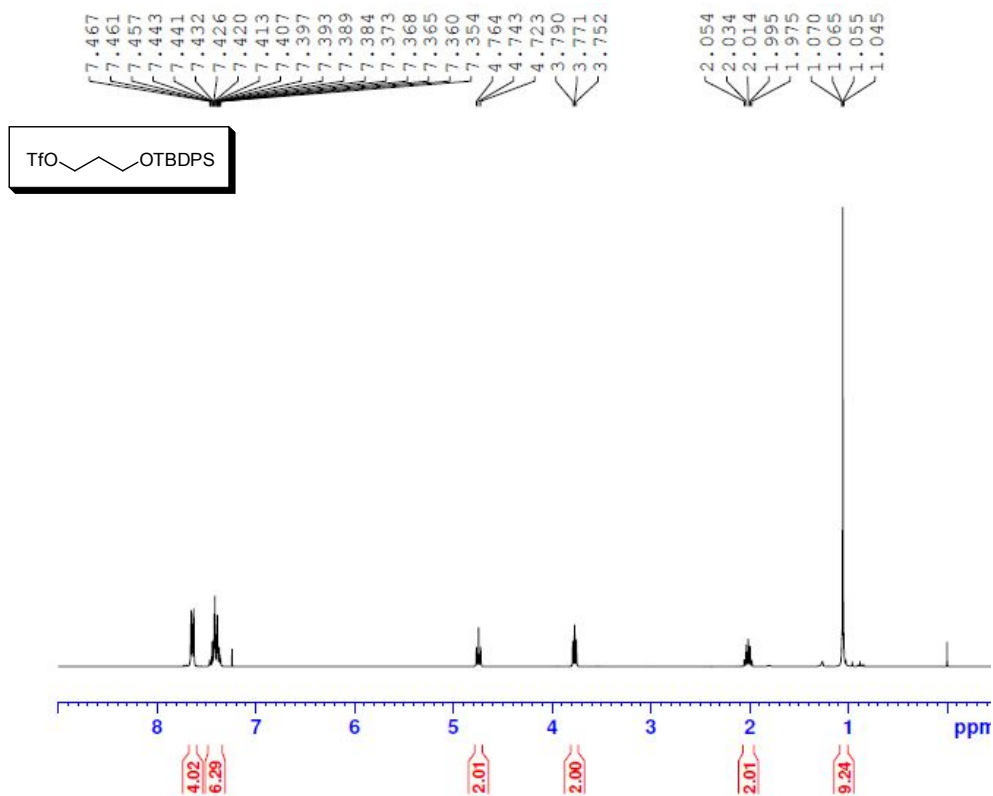

$^{13}\text{C}$  NMR ( $\text{CDCl}_3$ , 75 MHz)

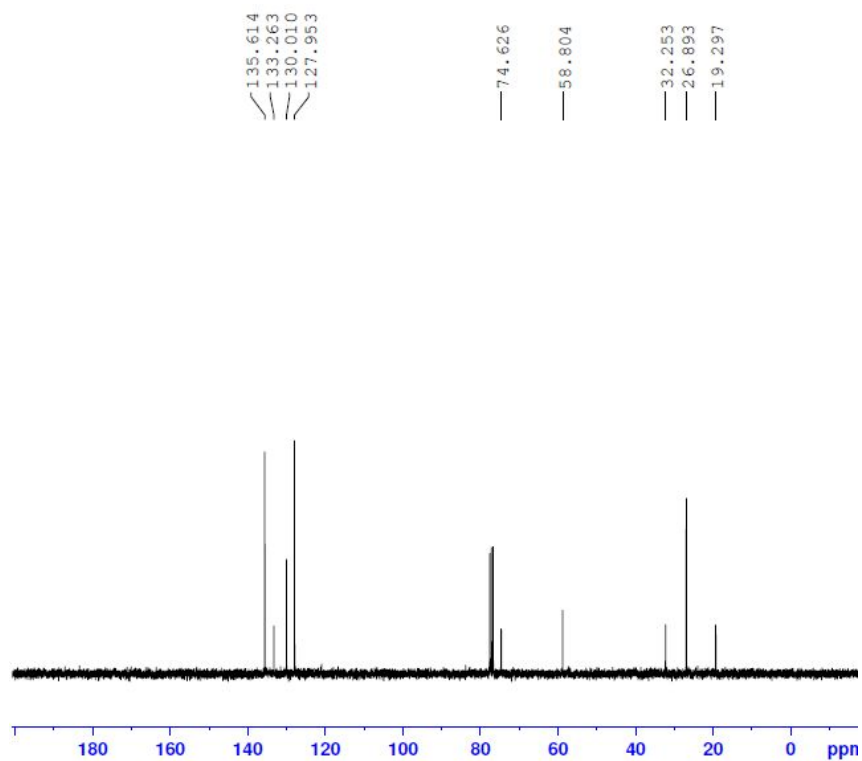

Compound **9**

$^1\text{H}$  NMR ( $\text{CDCl}_3$ , 300 MHz)

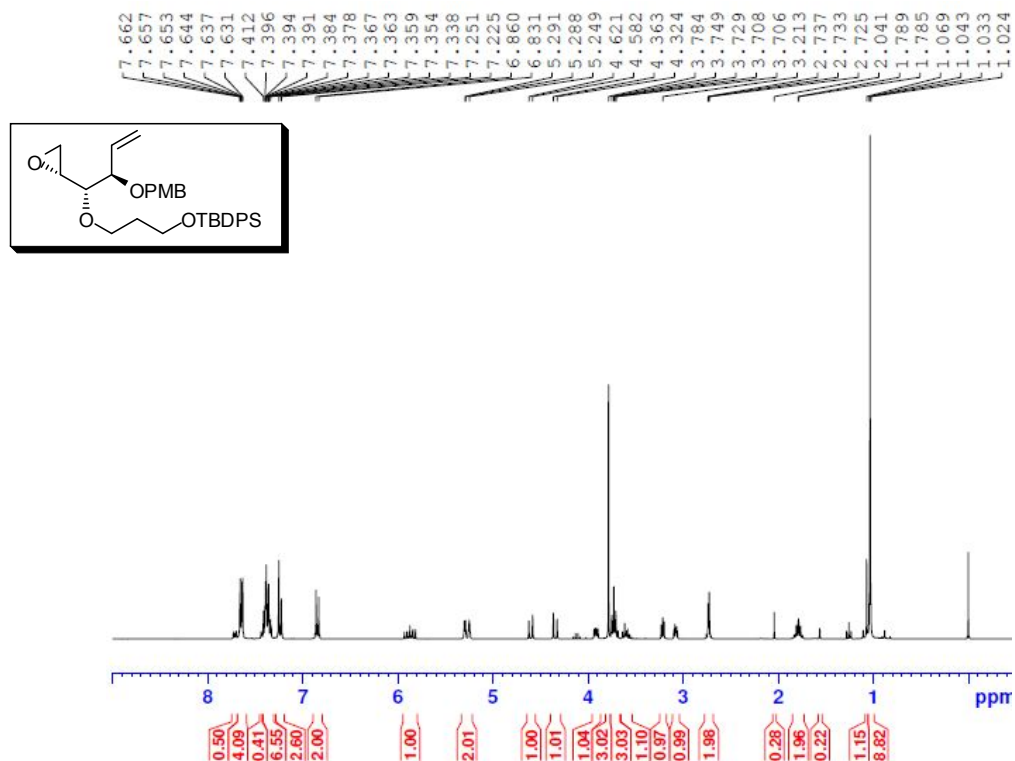

$^{13}\text{C}$  NMR ( $\text{CDCl}_3$ , 75 MHz)

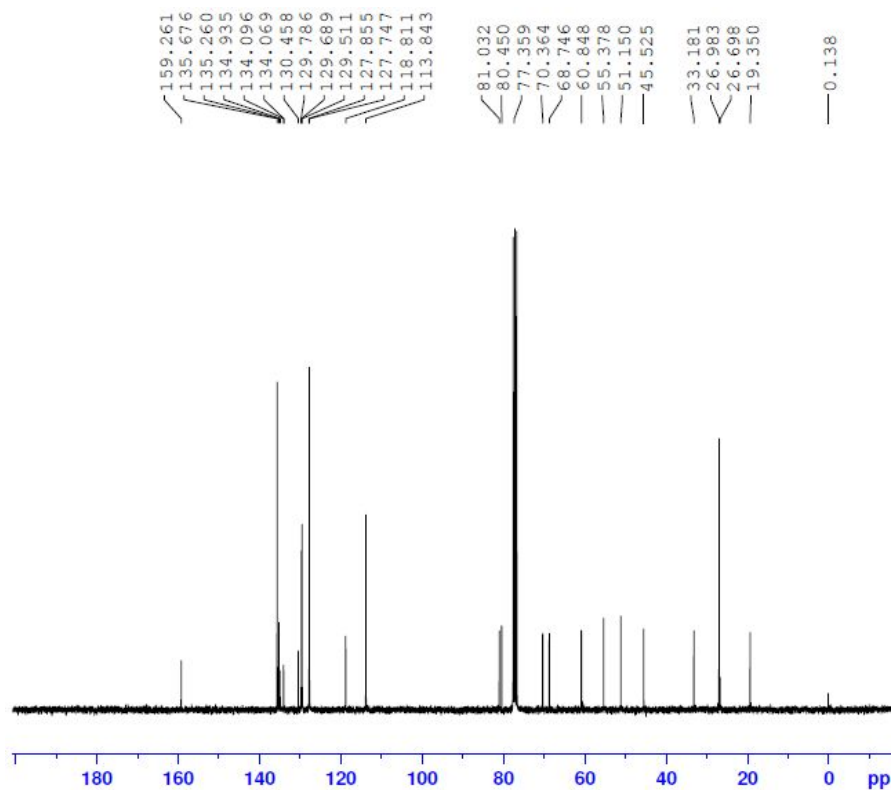

Compound **11**

$^1\text{H}$  NMR ( $\text{CDCl}_3$ , 300 MHz)

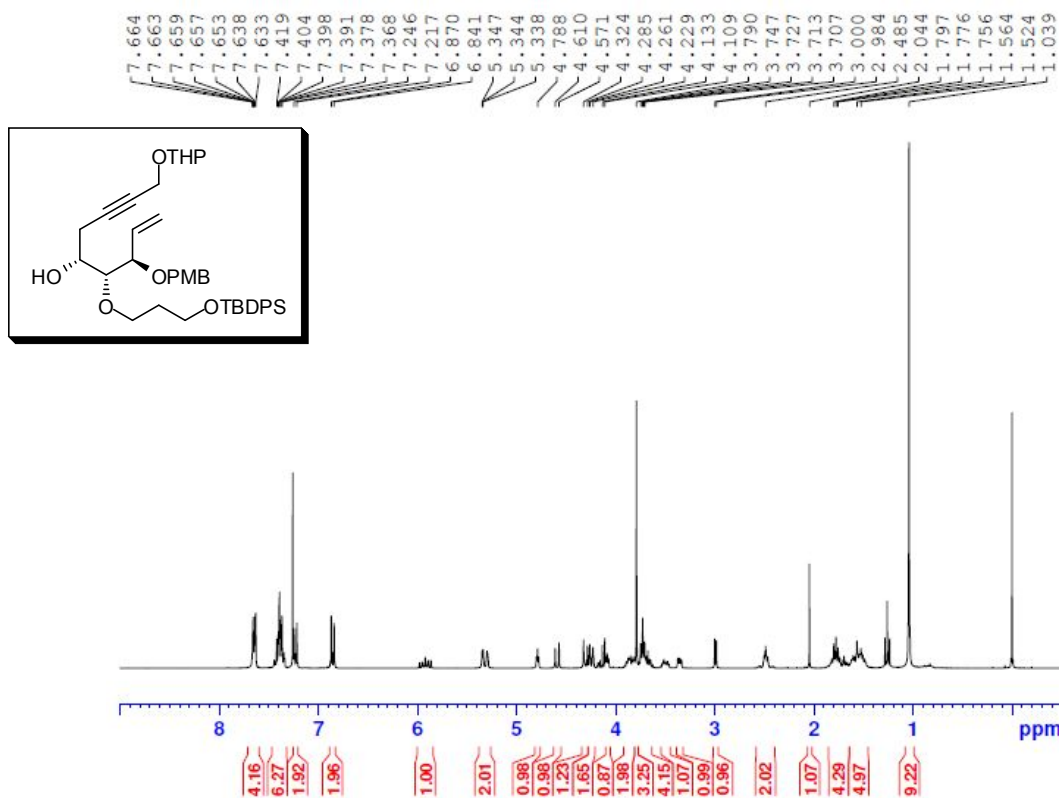

$^{13}\text{C}$  NMR ( $\text{CDCl}_3$ , 75 MHz)

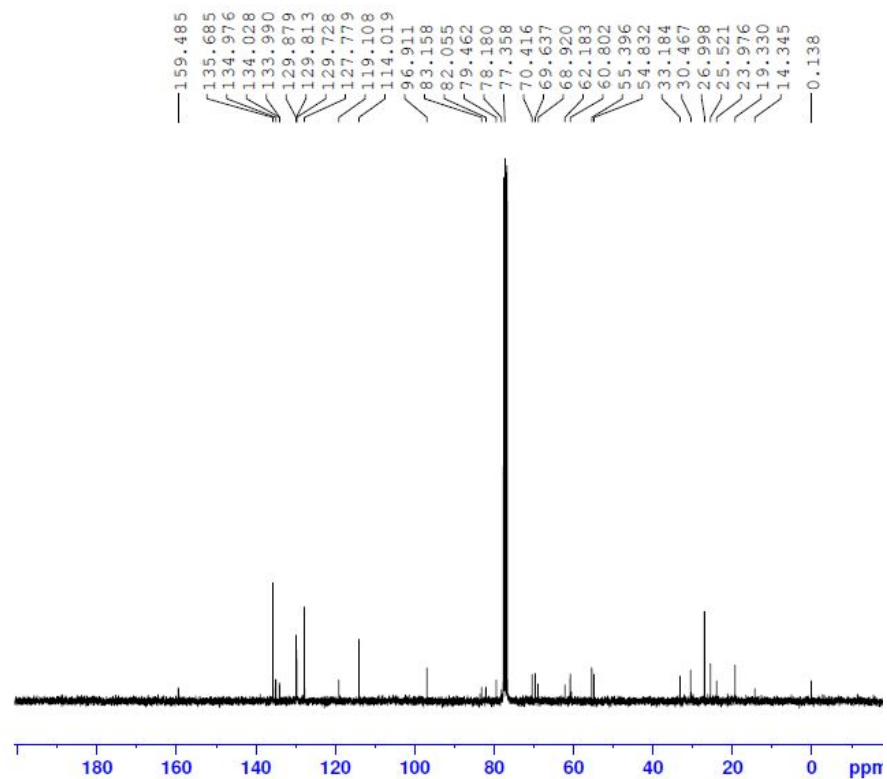

<sup>1</sup>H NMR (CDCl<sub>3</sub>, 300 MHz)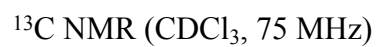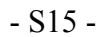

<sup>1</sup>H NMR (CDCl<sub>3</sub>, 300 MHz)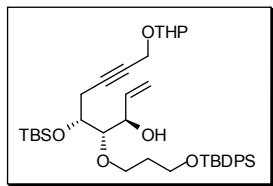 $^{13}\text{C}$  NMR ( $\text{CDCl}_3$ , 75 MHz)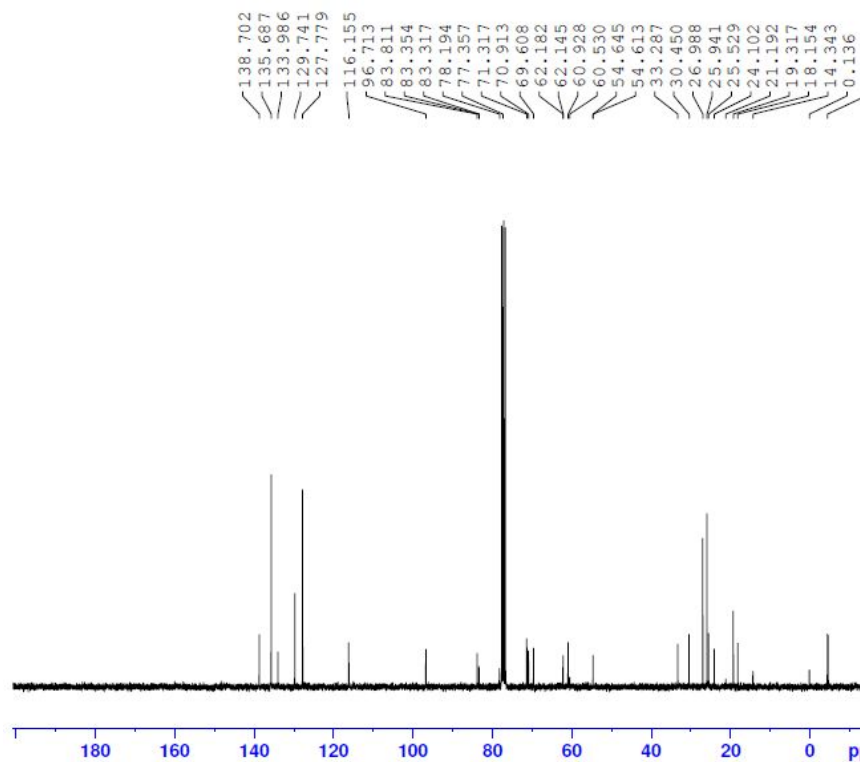



<sup>1</sup>H NMR (CDCl<sub>3</sub>, 300 MHz)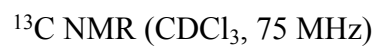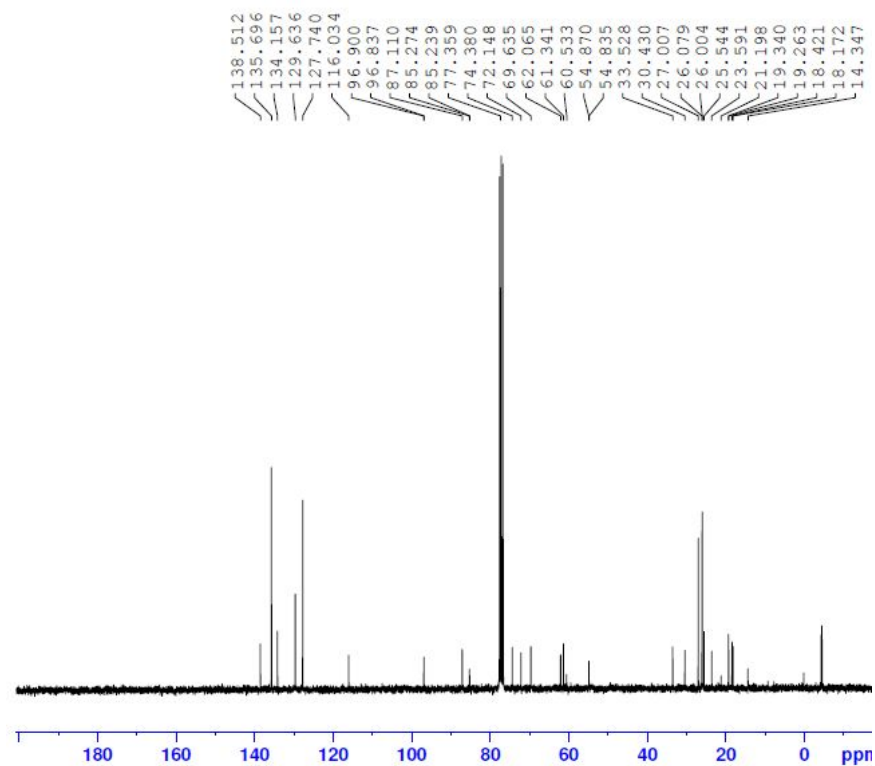

<sup>1</sup>H NMR (CDCl<sub>3</sub>, 300 MHz)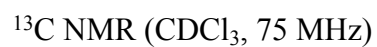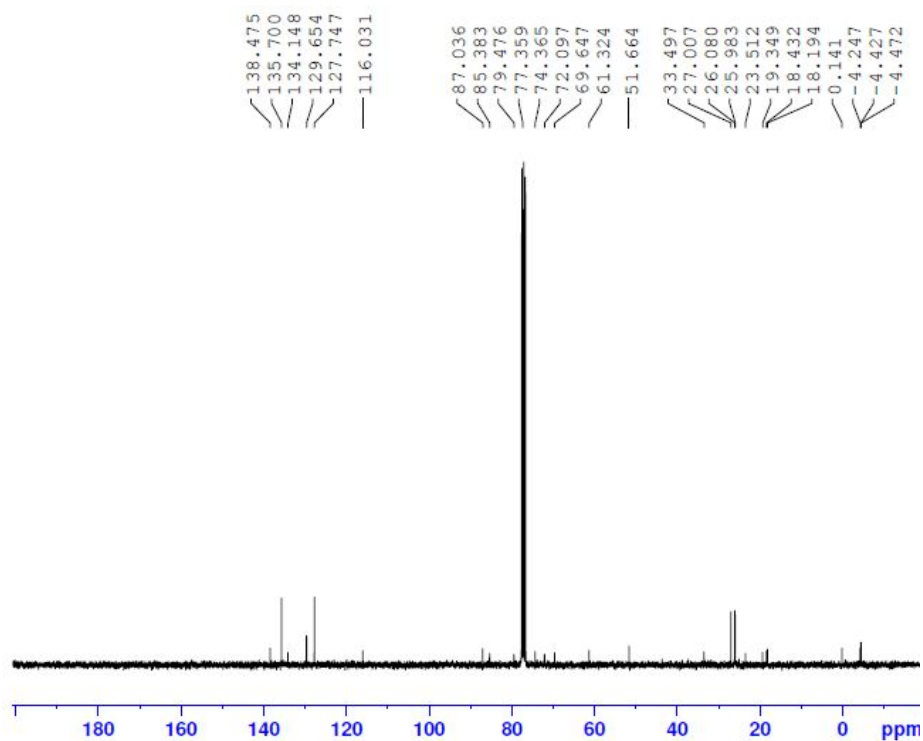

<sup>1</sup>H NMR (CDCl<sub>3</sub>, 300 MHz)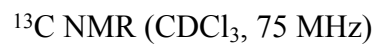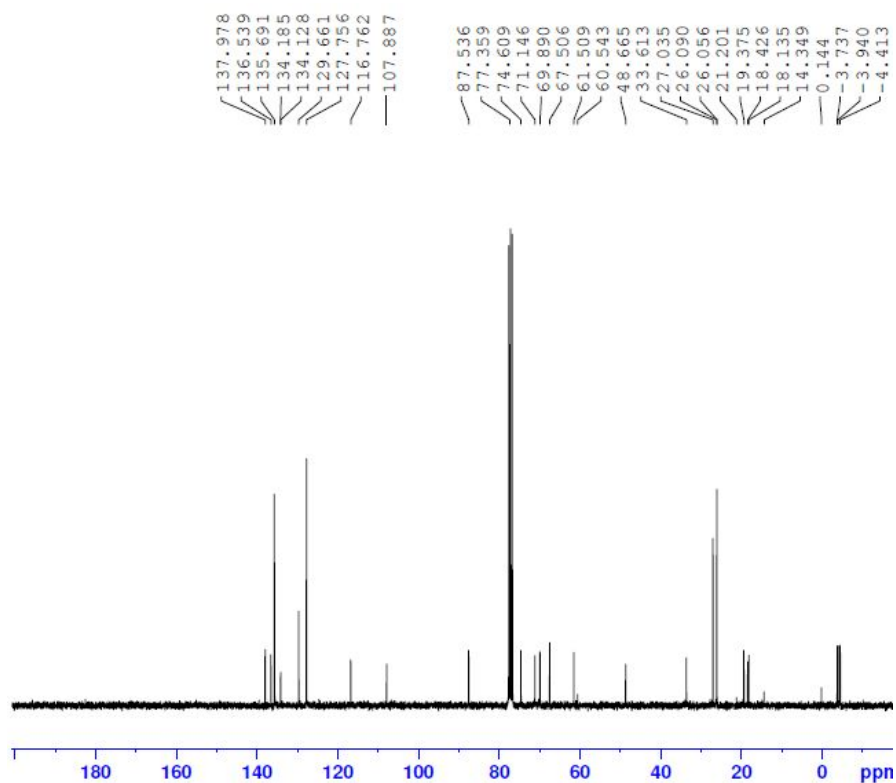

Compound **17**

$^1\text{H}$  NMR ( $\text{CDCl}_3$ , 300 MHz)

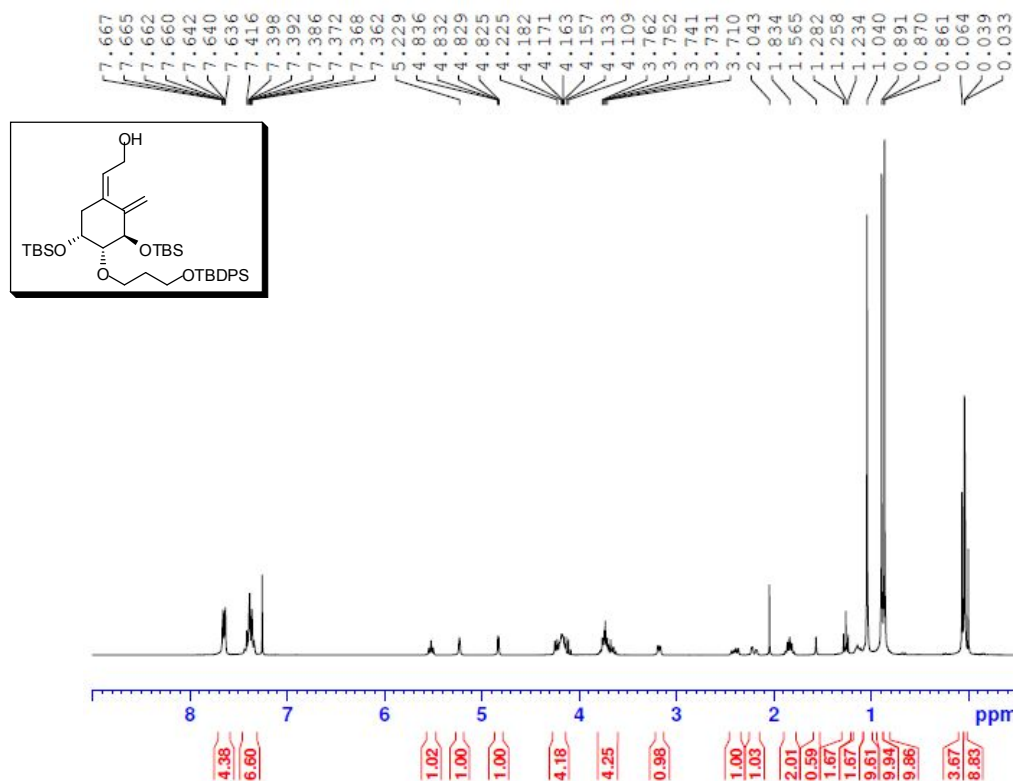

$^{13}\text{C}$  NMR ( $\text{CDCl}_3$ , 75 MHz)

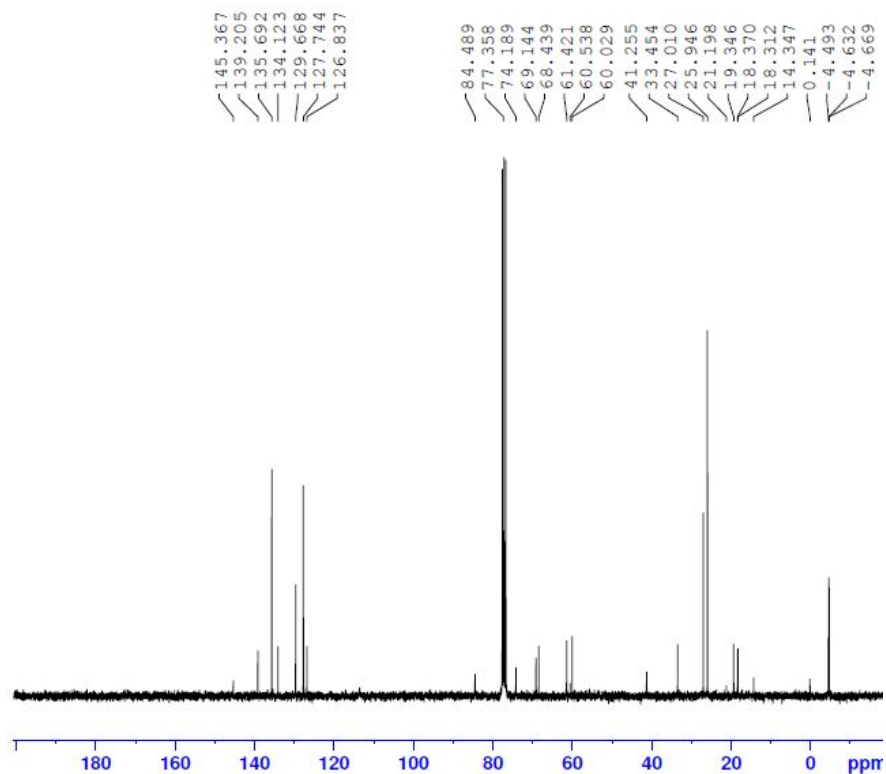

Compound **18**

$^1\text{H}$  NMR ( $\text{CDCl}_3$ , 300 MHz)

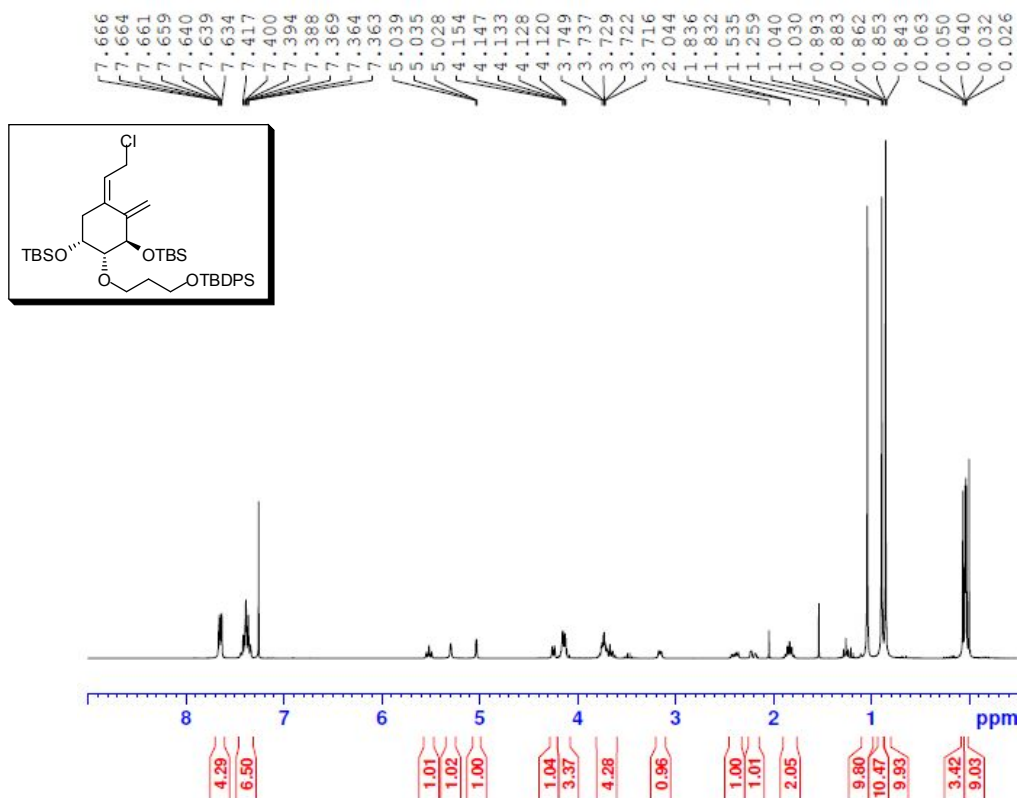

$^{13}\text{C}$  NMR ( $\text{CDCl}_3$ , 75 MHz)

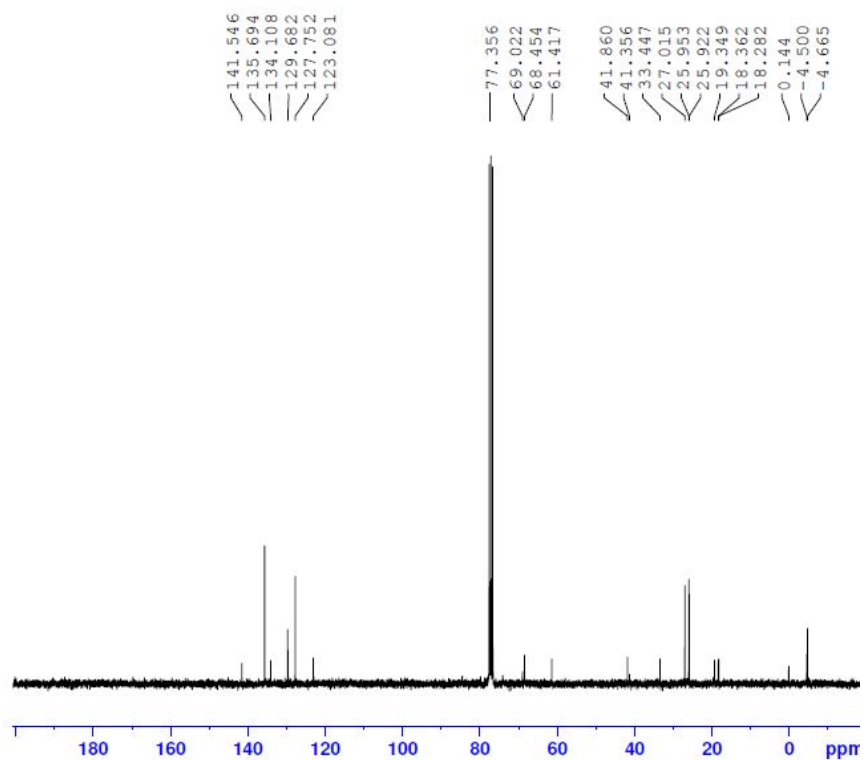

Compound **2**

$^1\text{H}$  NMR ( $\text{CDCl}_3$ , 300 MHz)

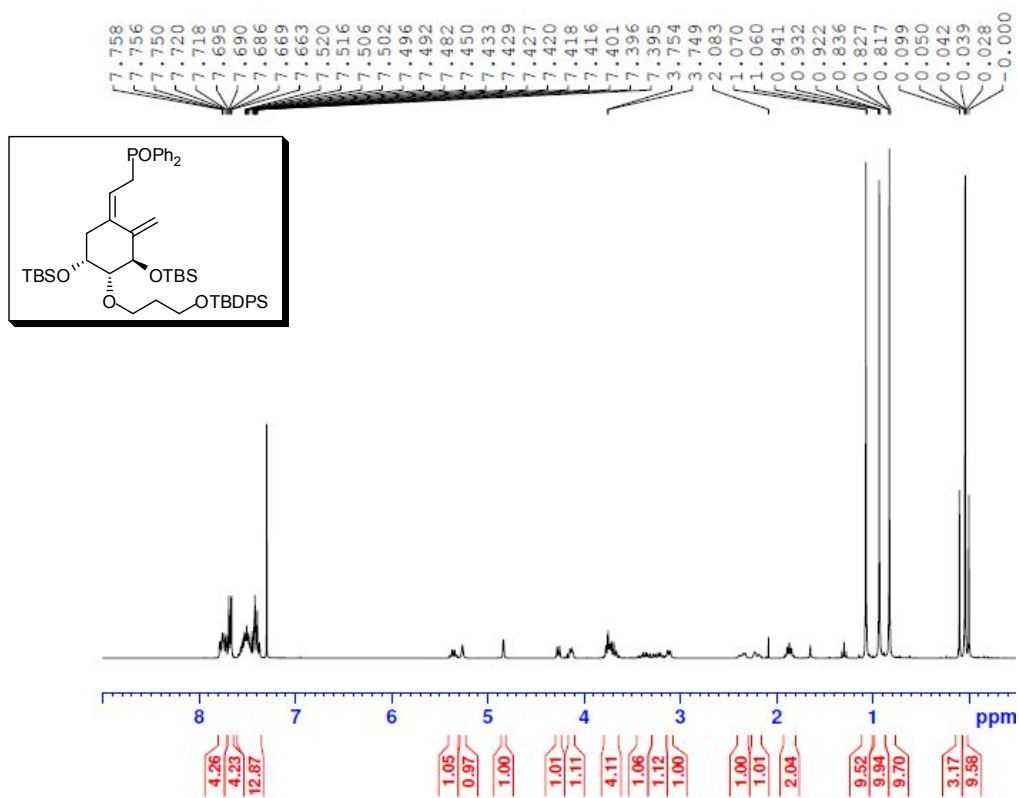

$^{13}\text{C}$  NMR ( $\text{CDCl}_3$ , 75 MHz)

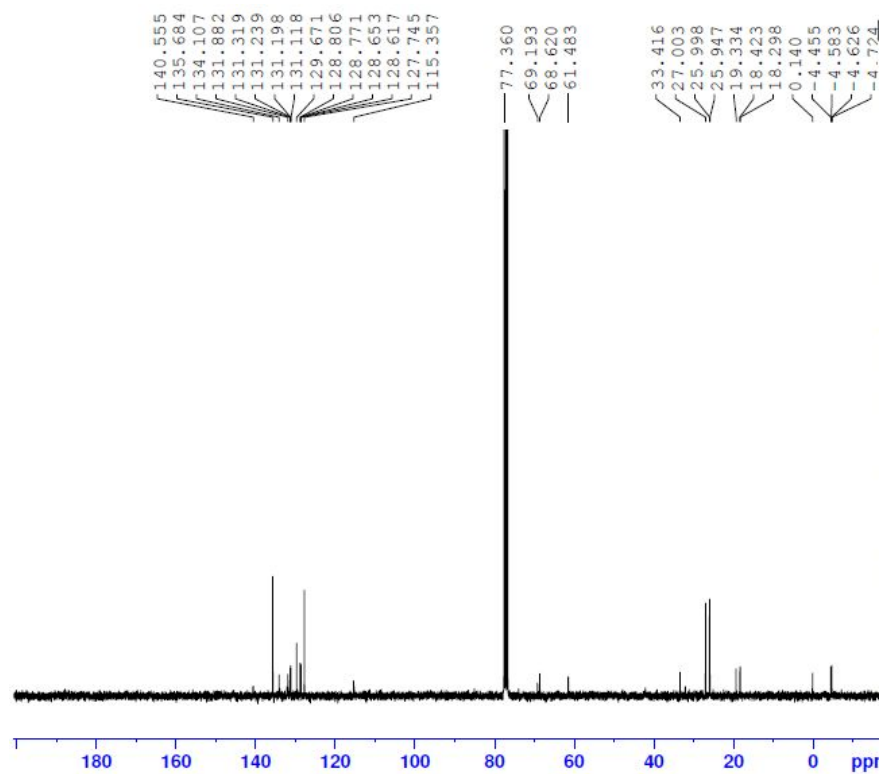

Compound **19**

$^1\text{H}$  NMR ( $\text{CDCl}_3$ , 300 MHz)

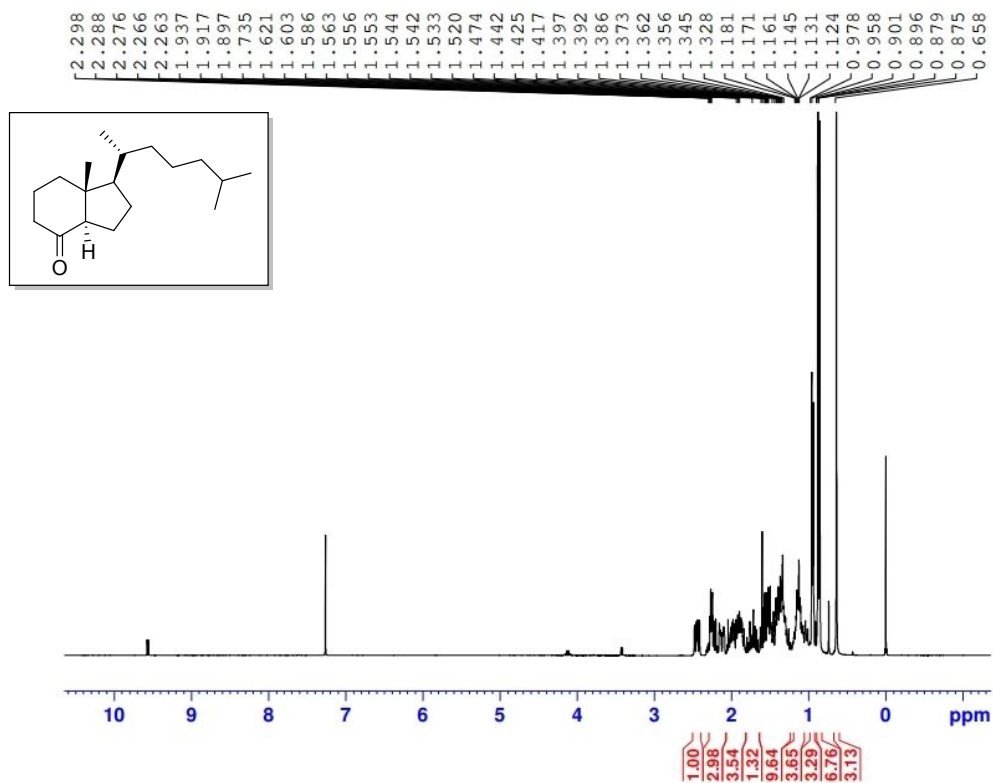

$^{13}\text{C}$  NMR ( $\text{CDCl}_3$ , 75 MHz)

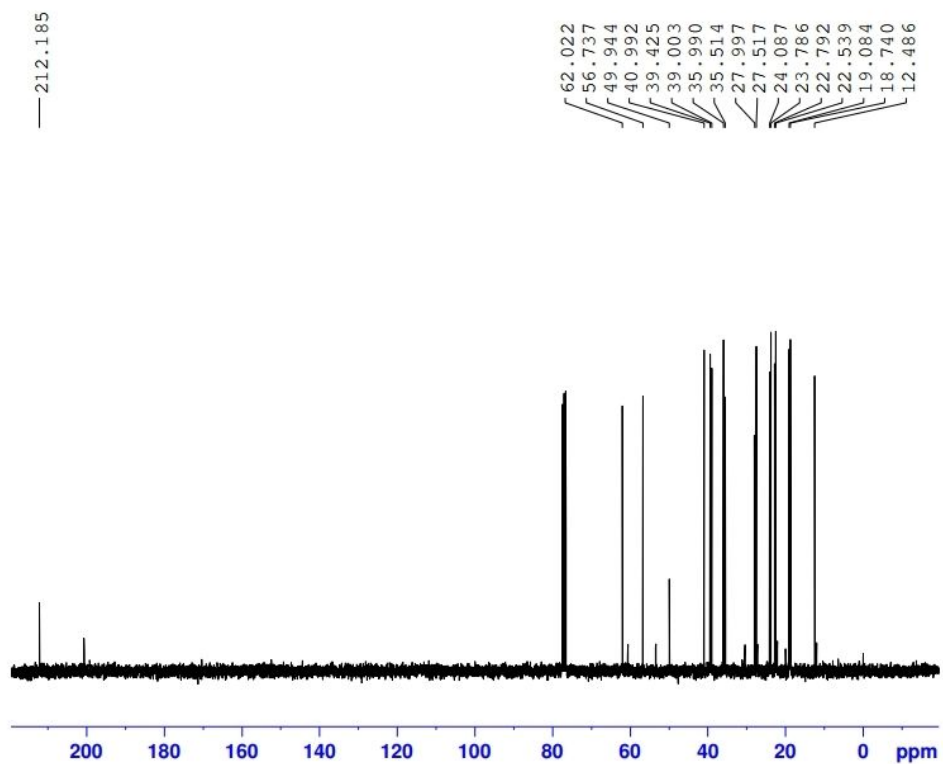

Compound **20**

$^1\text{H}$  NMR ( $\text{CDCl}_3$ , 300 MHz)

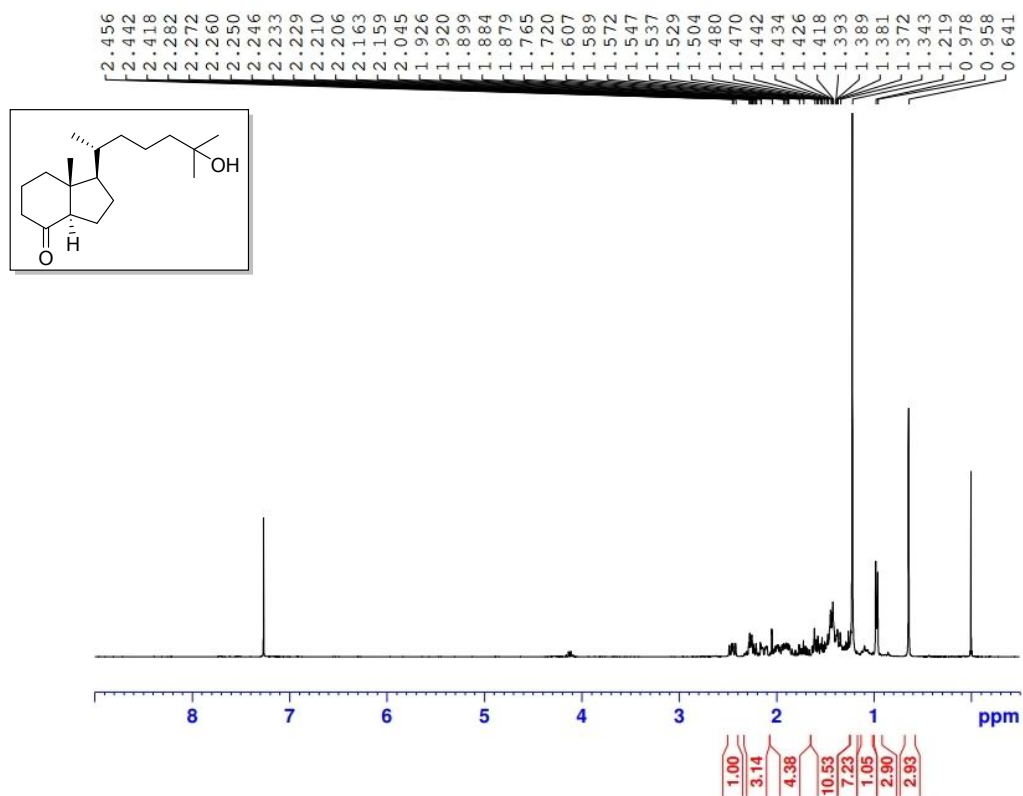

$^{13}\text{C}$  NMR ( $\text{CDCl}_3$ , 75 MHz)

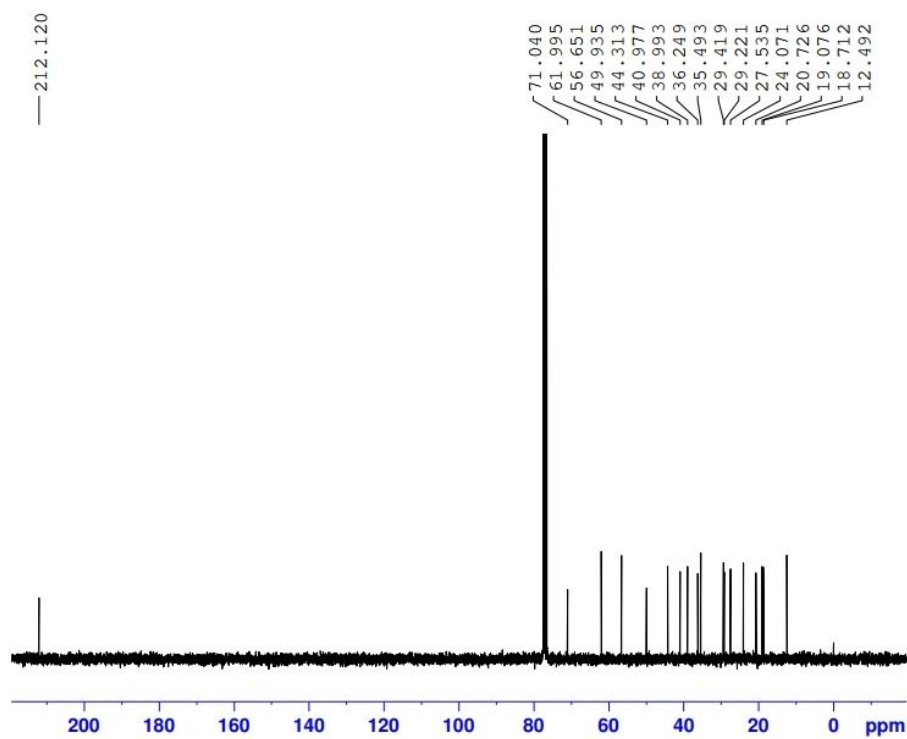



Compound **21**

$^1\text{H}$  NMR ( $\text{CDCl}_3$ , 300 MHz)

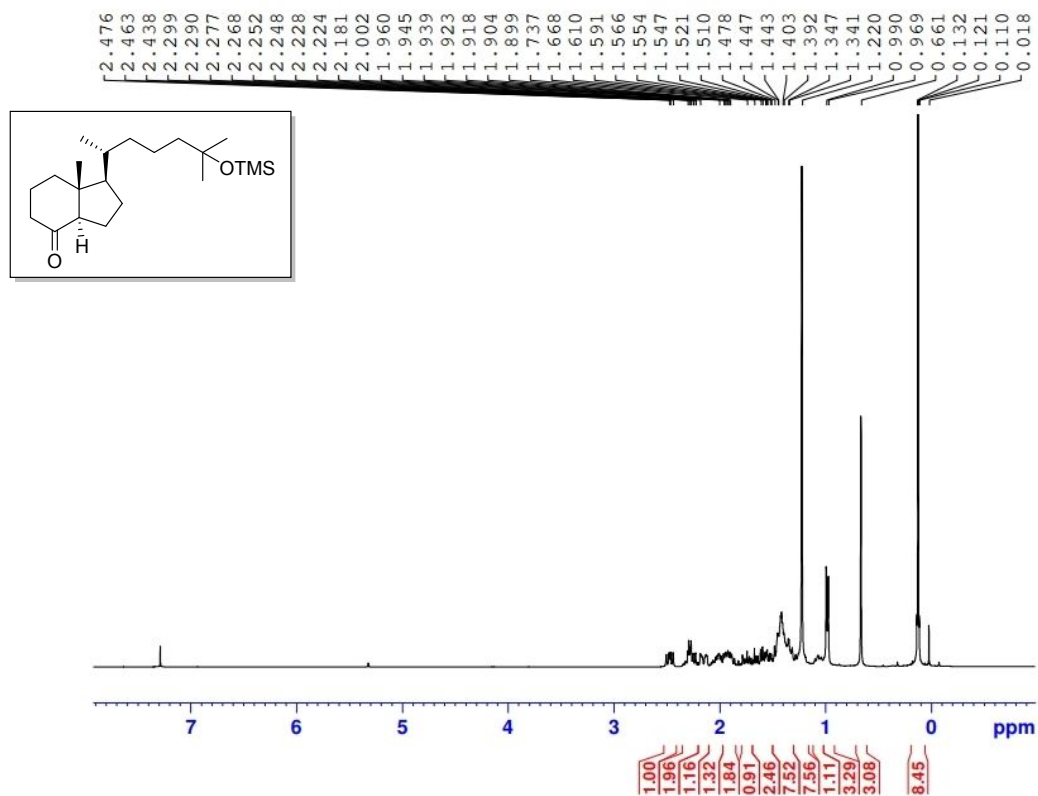

$^{13}\text{C}$  NMR ( $\text{CDCl}_3$ , 75 MHz)

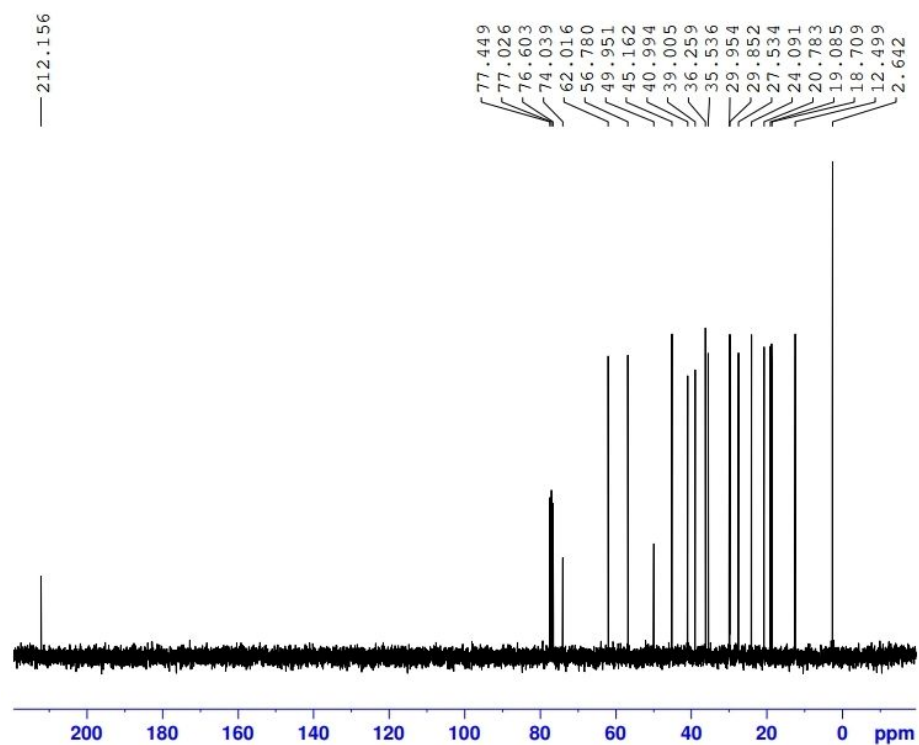

<sup>1</sup>H NMR (CDCl<sub>3</sub>, 300 MHz)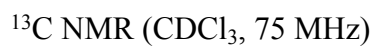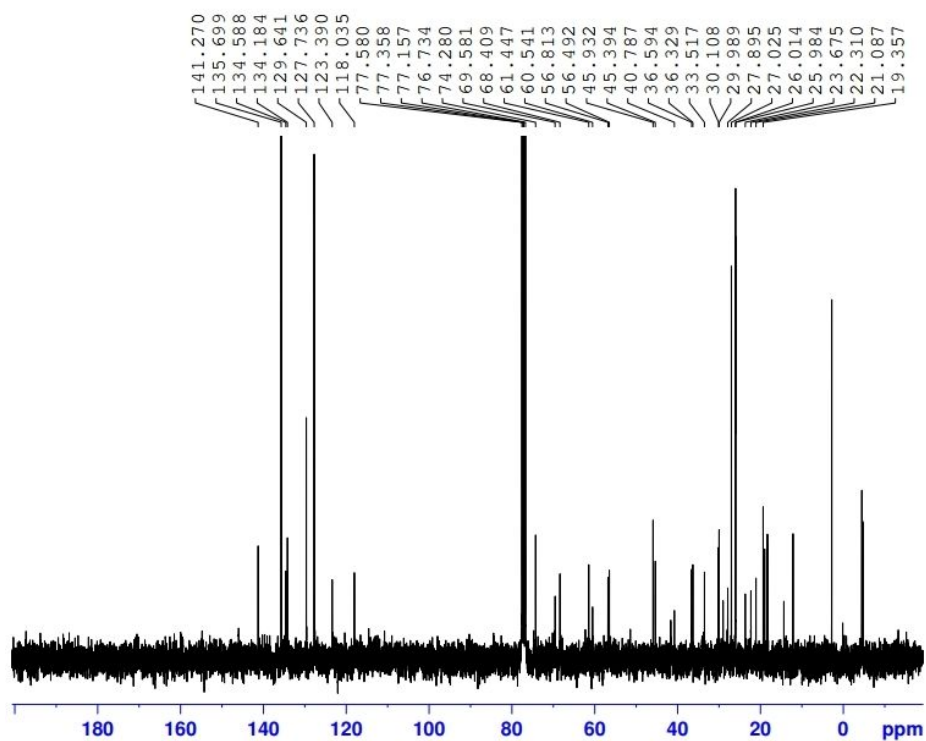

<sup>1</sup>H NMR (CDCl<sub>3</sub>, 300 MHz)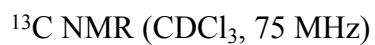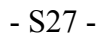

Compound **1** (eldecalcitol)

COSY (CDCl<sub>3</sub>, 300 MHz)

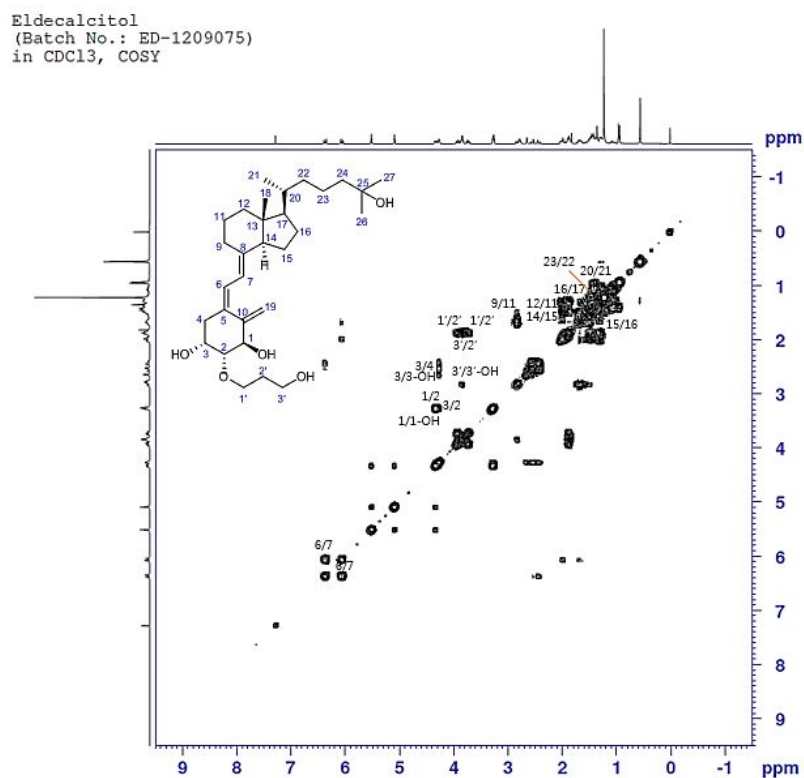

HSQC (CDCl<sub>3</sub>, 300 MHz)

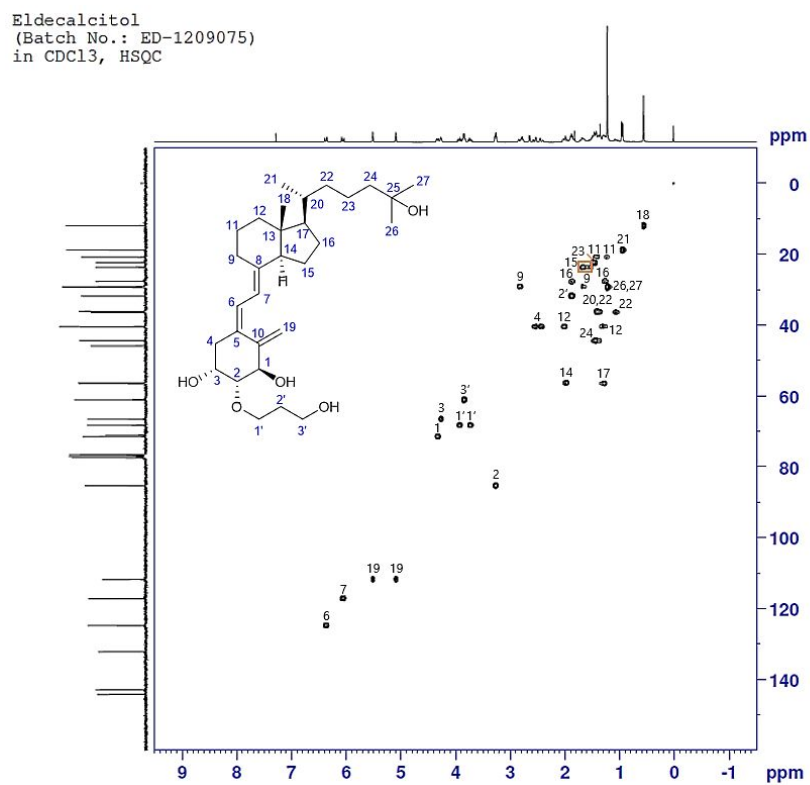

Supplement: Supplementary file 1 [file 25816160]
